# Supplementary material for: Characterization of DNA hydroxymethylation in the hypothalamus of elderly mice with post-operative cognitive dysfunction
Source: PubMed Central journal article supplement — Exp Ther Med. 2019 Sep 26;18(5):4002–10. doi: 10.3892/etm.2019.8056 (PMC6796353; doi:10.3892/etm.2019.8056), 2019-09-26

Figure S1. Scatter plots of the correlation between 5mC/5hmC and mRNA expression levels of nine genes. The Pearson's correlation analysis of 5mC/5hmC and mRNA levels of (A) ACSS2, (B) BDNF, (C) CCL2, (D) FAS, (E) GCR (F) GDNF, (G) GLUR2, (H) HMGB1 and (I) MMP9 from multiple individual experiments (control for five; POCD for six duplications). The coefficients of Pearson's correlations without statistical significance are not shown. 5hmC, 5-hydroxymethylcytosine; 5mC, 5-methylcytosine; ACSS2, acyl-CoA synthetase short chain family member 2; BDNF, brain derived neurotrophic factor; CCL2, C-C motif chemokine ligand 2; FAS, fas cell surface death receptor; GCR, glucocorticoid receptor; GDNF, glial cell-derived neurotrophic factor; GluR2, glutamate receptor 2 precursor; HMGB1, high mobility group protein B1; MMP9, matrixmetallopeptidase-9.

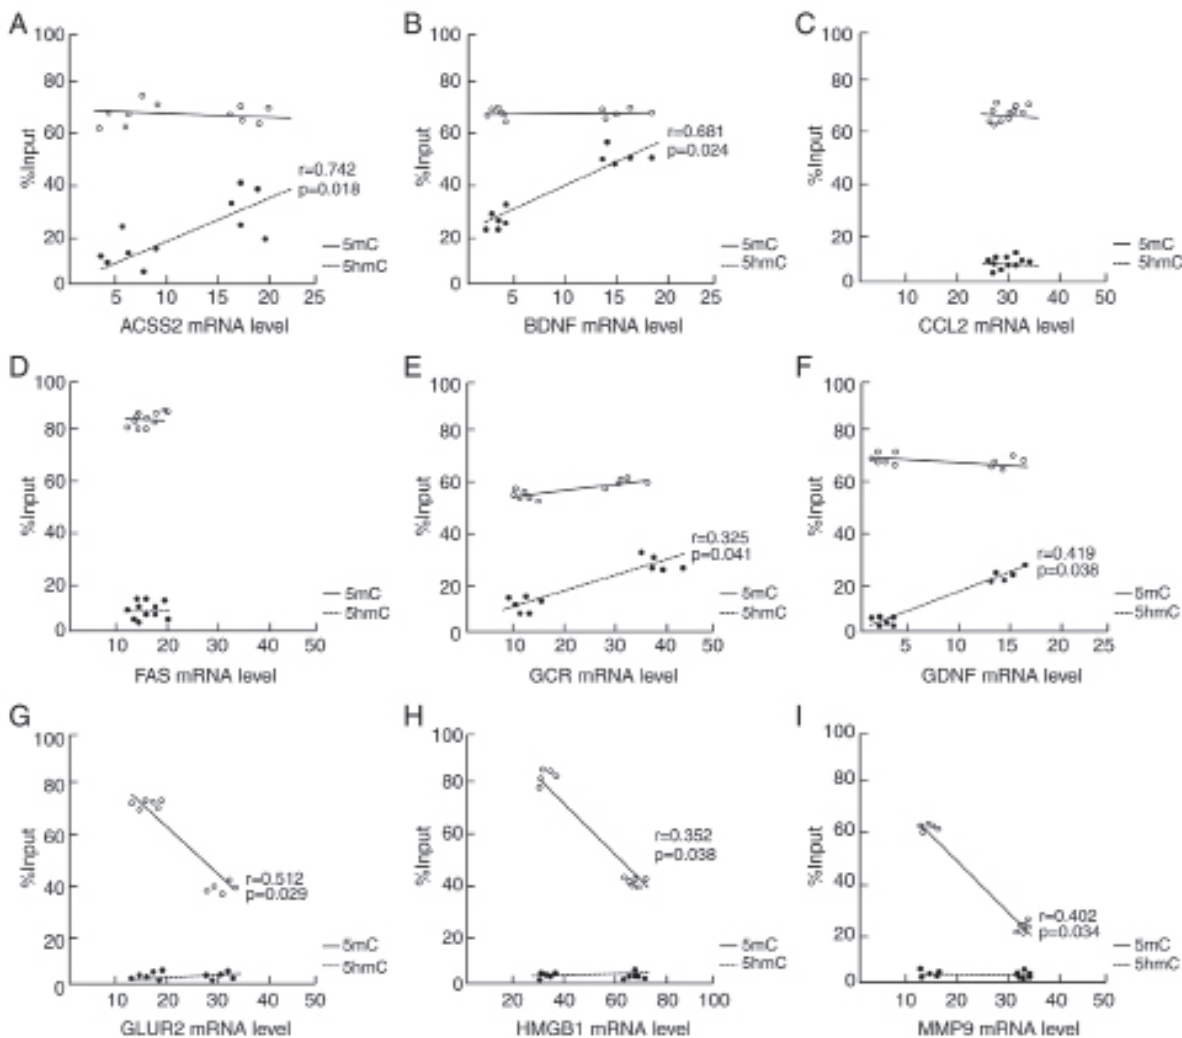

Supplement: Supplementary_Data.pdf [file Supplementary_Data.pdf]
